# Supplementary material for: Essential Oils of Four Virginia Mountain Mint (Pycnanthemum virginianum) Varieties Grown in North Alabama
Source: MDPI journal article supplement (doi:10.3390/plants10071397), 2021-07-08
Supplement: s1 [file s1]

**Supplementary Table S1.** Essential oil composition of *Pycnanthemum virginianum* variety M1.

[illegible]

|      |      |                                |             |             |             |             |             |             |             |             |             |
|------|------|--------------------------------|-------------|-------------|-------------|-------------|-------------|-------------|-------------|-------------|-------------|
| 1146 | 1144 | <i>trans</i> -Tagetone         | ---         | ---         | ---         | ---         | ---         | tr          | ---         | ---         | tr          |
| 1150 | 1149 | <i>p</i> -Menth-3-en-8-ol      | 0.1         | 0.1         | tr          | ---         | ---         | ---         | ---         | ---         | ---         |
| 1150 | 1145 | <i>trans</i> -Verbenol         | 0.1         | 0.1         | 0.1         | 0.1         | 0.1         | 0.1         | 0.1         | 0.1         | 0.1         |
| 1156 | 1156 | <b>Menthone</b>                | <b>2.2</b>  | <b>0.9</b>  | <b>1.5</b>  | <b>4.2</b>  | <b>5.4</b>  | <b>4.4</b>  | <b>5.8</b>  | <b>6.4</b>  | <b>4.7</b>  |
| 1169 | 1166 | <b>Isomenthone</b>             | <b>26.7</b> | <b>12.9</b> | <b>20.2</b> | <b>50.5</b> | <b>58.1</b> | <b>55.4</b> | <b>70.5</b> | <b>69.6</b> | <b>67.8</b> |
| 1175 | 1171 | <i>p</i> -Mentha-1,5-dien-8-ol | ---         | ---         | ---         | ---         | ---         | ---         | ---         | tr          | ---         |
| 1176 | 1173 | Borneol                        | ---         | ---         | ---         | tr          | ---         | tr          | tr          | tr          | tr          |
| 1178 | 1176 | <i>trans</i> -Isopulegone      | 1.5         | 1.7         | 1.6         | 1.2         | 1.1         | 1.2         | 0.9         | 0.9         | 0.9         |
| 1182 | 1180 | Terpinen-4-ol                  | tr          | 0.1         | tr          |
| 1184 | 1184 | 1-Decen-3-ol                   | tr          | tr          | tr          | tr          | ---         | ---         | ---         | ---         | ---         |
| 1187 | 1184 | 6-Methyl-2-vinyl-5-hepten-1-ol | tr          | tr          | tr          | tr          | tr          | ---         | tr          | 0.1         | ---         |
| 1193 | 1190 | <i>neoiso</i> -Menthol         | ---         | ---         | ---         | ---         | ---         | ---         | ---         | tr          | ---         |
| 1196 | 1195 | $\alpha$ -Terpineol            | 0.3         | 0.3         | 0.3         | 0.3         | 0.3         | 0.3         | 0.3         | 0.3         | 0.2         |
| 1201 | 1201 | <i>cis</i> -Piperitenol        | ---         | ---         | ---         | ---         | ---         | ---         | ---         | tr          | ---         |
| 1207 | 1208 | Decanal                        | ---         | ---         | ---         | tr          | tr          | tr          | tr          | 0.1         | tr          |
| 1208 | 1208 | Verbenone                      | ---         | ---         | ---         | 0.1         | 0.1         | 0.1         | 0.1         | 0.1         | 0.1         |
| 1218 | 1217 | 3-Isopropylbenzaldehyde        | ---         | ---         | ---         | 0.1         | 0.1         | 0.1         | 0.2         | 0.3         | 0.3         |
| 1226 | 1230 | Cuminaldehyde                  | 0.2         | 0.1         | 0.1         | 0.2         | 0.1         | 0.1         | ---         | ---         | ---         |
| 1243 | 1241 | <b>Pulegone</b>                | <b>57.3</b> | <b>74.0</b> | <b>64.7</b> | <b>33.4</b> | <b>25.7</b> | <b>30.1</b> | <b>12.5</b> | <b>11.4</b> | <b>15.0</b> |
| 1254 | 1254 | Piperitone                     | 0.1         | tr          | 0.1         | 0.2         | 0.3         | 0.2         | 0.9         | 1.0         | 1.0         |
| 1258 | 1261 | Pulegone oxide A               | ---         | tr          | tr          | ---         | ---         | ---         | ---         | ---         | ---         |
| 1269 | 1270 | <i>iso</i> -Piperitenone       | tr          | 0.1         | 0.1         | 0.1         | 0.1         | tr          | tr          | tr          | tr          |
| 1287 | 1287 | Pulegone oxide B               | 0.1         | 0.3         | 0.1         | ---         | ---         | 0.1         | ---         | 0.2         | 0.2         |
| 1289 | 1289 | Thymol                         | 0.5         | 0.4         | 0.4         | 0.3         | 0.1         | tr          | tr          | 0.1         | tr          |
| 1297 | 1296 | Carvacrol                      | tr          | tr          | tr          | tr          | tr          | ---         | ---         | tr          | ---         |
| 1297 | 1300 | Pulegone oxide C               | ---         | tr          | ---         | ---         | ---         | ---         | ---         | ---         | ---         |
| 1308 | 1309 | 4-Vinylguaicol                 | tr          | ---         | tr          | tr          | ---         | ---         | tr          | tr          | tr          |
| 1331 | 1326 | Bicycloelemene                 | tr          | tr          | tr          | tr          | tr          | ---         | tr          | tr          | tr          |
| 1335 | 1335 | $\delta$ -Elemene              | 0.3         | tr          | 0.3         | 0.2         | tr          | tr          | 0.2         | 0.2         | 0.2         |
| 1337 | 1339 | Piperitenone                   | 0.3         | 0.3         | 0.3         | 0.2         | 0.1         | 0.1         | 0.1         | 0.1         | 0.2         |
| 1338 | ---  | <b>Unidentified</b>            | <b>0.1</b>  | <b>tr</b>   | <b>0.1</b>  | <b>0.1</b>  | <b>0.1</b>  | <b>---</b>  | <b>tr</b>   | <b>tr</b>   | <b>---</b>  |

|      |      |                              |     |     |     |     |     |     |     |     |
|------|------|------------------------------|-----|-----|-----|-----|-----|-----|-----|-----|
| 1342 | 1348 | Mint furanone isomer A       | --- | tr  | --- | --- | --- | --- | --- | --- |
| 1344 | 1349 | Mint furanone isomer B       | --- | tr  | tr  | --- | --- | --- | --- | --- |
| 1375 | 1375 | $\alpha$ -Copaene            | tr  |
| 1381 | 1383 | cis- $\beta$ -Elemene        | tr  |
| 1383 | 1382 | $\beta$ -Bourbonene          | 0.1 | 0.1 | 0.1 | 0.1 | tr  | 0.1 | 0.2 | 0.3 |
| 1385 | 1385 | $\alpha$ -Bourbonene         | tr  |
| 1389 | 1390 | trans- $\beta$ -Elemene      | 0.3 | 0.2 | 0.3 | 0.2 | 0.1 | 0.2 | 0.2 | 0.3 |
| 1391 | 1392 | (Z)-Jasmone                  | 0.1 | 0.1 | 0.1 | 0.1 | 0.2 | 0.1 | 0.1 | 0.1 |
| 1419 | 1417 | (E)- $\beta$ -Caryophyllene  | 1.4 | 1.0 | 1.2 | 1.0 | 0.1 | 0.9 | 1.1 | 1.4 |
| 1429 | 1430 | $\beta$ -Copaene             | tr  | tr  | tr  | tr  | 1.0 | tr  | tr  | tr  |
| 1432 | 1432 | trans- $\alpha$ -Bergamotene | 0.2 | 0.2 | 0.2 | 0.1 | tr  | 0.1 | 0.1 | 0.1 |
| 1439 | 1439 | (Z)- $\beta$ -Farnesene      | --- | --- | --- | --- | --- | --- | --- | --- |
| 1440 | 1443 | Citronellyl propionate       | --- | --- | --- | --- | --- | tr  | --- | --- |
| 1443 | 1447 | iso-Germacrene D             | --- | --- | --- | --- | --- | tr  | tr  | tr  |
| 1452 | 1452 | (E)- $\beta$ -Farnesene      | --- | --- | --- | --- | --- | tr  | --- | --- |
| 1454 | 1453 | $\alpha$ -Humulene           | 0.2 | 0.2 | 0.2 | 0.1 | 0.1 | 0.1 | 0.2 | 0.2 |
| 1467 | 1465 | cis-Muurola-4(14),5-diene    | --- | --- | --- | --- | --- | tr  | --- | tr  |
| 1474 | 1478 | $\gamma$ -Muurolene          | --- | --- | --- | --- | --- | tr  | --- | tr  |
| 1480 | 1480 | Germacrene D                 | 1.5 | 0.8 | 1.4 | 1.1 | 0.2 | 0.7 | 1.1 | 1.1 |
| 1483 | 1483 | trans- $\beta$ -Bergamotene  | tr  | tr  | tr  | tr  | 0.9 | tr  | tr  | tr  |
| 1484 | 1485 | $\gamma$ -Thujaplicin        | --- | tr  | --- | --- | --- | --- | --- | --- |
| 1489 | 1489 | (Z,E)- $\alpha$ -Farnesene   | --- | --- | --- | tr  | --- | tr  | tr  | tr  |
| 1494 | 1497 | Bicyclogermacrene            | 0.1 | 0.1 | 0.1 | 0.1 | tr  | 0.1 | 0.1 | 0.1 |
| 1503 | 1504 | (E,E)- $\alpha$ -Farnesene   | 0.3 | 0.2 | 0.3 | 0.2 | 0.1 | 0.1 | 0.2 | 0.2 |
| 1506 | 1508 | $\beta$ -Bisabolene          | tr  | tr  | tr  | tr  | 0.2 | tr  | tr  | tr  |
| 1512 | 1512 | $\gamma$ -Cadinene           | tr  |
| 1517 | 1518 | $\delta$ -Cadinene           | tr  |
| 1523 | 1523 | $\beta$ -Sesquiphellandrene  | 0.2 | 0.1 | 0.2 | 0.1 | tr  | 0.1 | 0.1 | 0.1 |
| 1547 | 1546 | $\alpha$ -Elemol             | tr  | tr  | tr  | tr  | 0.1 | tr  | tr  | tr  |
| 1557 | 1557 | Germacrene B                 | tr  |
| 1560 | 1560 | (E)-Nerolidol                | tr  |

[illegible]

**Supplementary Table S2.** Essential oil composition of *Pycnanthemum virginianum* variety M2.

| RI(calc)    | RI(db)      | Compound                       | M2-R1-H1   | M2-R2-H1   | M2-R3-H1   | M2-R1-H2    | M2-R2-H2   | M2-R3-H2   | M2-R1-H3   | M2-R2-H3   | M2-R3-H3   |
|-------------|-------------|--------------------------------|------------|------------|------------|-------------|------------|------------|------------|------------|------------|
| 925         | 925         | $\alpha$ -Thujene              | 0.4        | 0.3        | 1.4        | 0.8         | 0.1        | 0.7        | tr         | 0.3        | 0.2        |
| 932         | 932         | $\alpha$ -Pinene               | 0.2        | 0.1        | 0.7        | 0.4         | 0.1        | 0.3        | tr         | 0.2        | 0.1        |
| 949         | 950         | Camphene                       | 0.1        | tr         | 0.2        | 0.1         | tr         | 0.1        | tr         | 0.1        | tr         |
| 952         | 951         | 3-Methylcyclohexanone          | tr         | tr         | tr         | ---         | tr         | tr         | tr         | tr         | tr         |
| 953         | 953         | Thuja-2,4(10)-diene            | ---        | ---        | ---        | ---         | ---        | tr         | ---        | ---        | ---        |
| 961         | 960         | Benzaldehyde                   | ---        | ---        | ---        | ---         | tr         | tr         | tr         | tr         | tr         |
| 972         | 971         | Sabinene                       | 0.2        | 0.1        | 0.4        | 0.2         | 0.1        | 0.3        | tr         | 0.2        | 0.2        |
| 977         | 978         | $\beta$ -Pinene                | 0.1        | 0.1        | 0.3        | 0.2         | 0.1        | 0.2        | tr         | 0.1        | 0.1        |
| 980         | 978         | 1-Octen-3-ol                   | 2.6        | 2.6        | 2.7        | 1.6         | 2.1        | 2.3        | 1.4        | 2.4        | 2.7        |
| 984         | 983         | 3-Octanone                     | 0.4        | 0.3        | 0.5        | 0.4         | 0.4        | 0.5        | 0.3        | 0.4        | 0.5        |
| 990         | 989         | Myrcene                        | 2.9        | 2.2        | 4.4        | 3.0         | 1.6        | 3.3        | 1.1        | 2.3        | 2.4        |
| 997         | 996         | 3-Octanol                      | 0.2        | 0.2        | 0.2        | 0.2         | 0.2        | 0.2        | 0.2        | 0.2        | 0.2        |
| 1005        | 1004        | <i>p</i> -Mentha-1(7),8-diene  | tr         | tr         | tr         | tr          | tr         | tr         | tr         | tr         | tr         |
| 1007        | 1006        | $\alpha$ -Phellandrene         | 0.1        | 0.1        | 0.2        | 0.1         | tr         | 0.1        | tr         | tr         | tr         |
| 1009        | 1008        | $\delta$ -3-Carene             | tr         | tr         | 0.1        | 0.1         | tr         | tr         | tr         | tr         | tr         |
| 1017        | 1017        | $\alpha$ -Terpinene            | 1.2        | 0.9        | 1.5        | 0.8         | 0.5        | 1.0        | 0.2        | 0.5        | 0.5        |
| 1020        | 1022        | <i>m</i> -Cymene               | tr         | tr         | tr         | tr          | tr         | tr         | tr         | tr         | tr         |
| <b>1026</b> | <b>1024</b> | <b><i>p</i>-Cymene</b>         | <b>6.8</b> | <b>6.5</b> | <b>8.0</b> | <b>10.9</b> | <b>6.7</b> | <b>8.6</b> | <b>6.8</b> | <b>8.2</b> | <b>7.1</b> |
| 1028        | 1028        | 2-Acetyl-3-methylfuran         | ---        | ---        | ---        | tr          | ---        | tr         | 0.1        | tr         | tr         |
| <b>1030</b> | <b>1030</b> | <b>Limonene</b>                | <b>5.5</b> | <b>4.6</b> | <b>7.1</b> | <b>6.5</b>  | <b>3.9</b> | <b>6.1</b> | <b>2.9</b> | <b>4.8</b> | <b>4.5</b> |
| 1031        | 1029        | $\beta$ -Phellandrene          | 0.1        | 0.1        | 0.2        | ---         | 0.1        | ---        | ---        | ---        | ---        |
| 1032        | 1030        | 1,8-Cineole                    | 0.9        | 0.8        | 1.0        | 0.8         | 0.8        | 1.1        | 0.7        | 1.0        | 1.2        |
| 1033        | 1033        | Benzyl alcohol                 | ---        | ---        | ---        | ---         | ---        | ---        | tr         | ---        | ---        |
| 1035        | 1034        | ( <i>Z</i> )- $\beta$ -Ocimene | 0.1        | 0.1        | 0.2        | 0.1         | 0.1        | 0.2        | 0.1        | 0.1        | 0.1        |
| 1046        | 1045        | ( <i>E</i> )- $\beta$ -Ocimene | 1.2        | 0.9        | 1.5        | 1.0         | 0.7        | 1.4        | 0.4        | 0.5        | 0.7        |
| 1058        | 1057        | $\gamma$ -Terpinene            | 2.5        | 2.1        | 2.7        | 1.7         | 1.1        | 2.3        | 0.7        | 1.0        | 1.2        |
| 1069        | 1069        | <i>cis</i> -Sabinene hydrate   | 0.6        | 0.7        | 0.6        | 0.6         | 0.7        | 0.5        | 0.9        | 0.7        | 0.6        |
| 1080        | 1079        | 1-Nonen-3-ol                   | tr         | tr         | tr         | tr          | tr         | tr         | tr         | tr         | tr         |
| 1085        | 1086        | Terpinolene                    | 0.1        | 0.1        | 0.1        | 0.1         | 0.1        | 0.1        | tr         | tr         | 0.1        |

|             |             |                                      |             |             |             |            |             |             |             |             |             |
|-------------|-------------|--------------------------------------|-------------|-------------|-------------|------------|-------------|-------------|-------------|-------------|-------------|
| 1090        | 1091        | <i>p</i> -Cymenene                   | tr          | tr          | tr          | 0.1        | tr          | tr          | 0.1         | tr          | tr          |
| 1100        | 1099        | Linalool                             | 0.2         | 0.2         | 0.2         | 0.1        | 0.2         | 0.2         | 0.2         | 0.2         | 0.2         |
| 1101        | 1099        | <i>trans</i> -Sabinene hydrate       | 0.1         | 0.1         | 0.1         | 0.2        | 0.2         | 0.1         | 0.3         | 0.2         | 0.2         |
| 1105        | 1105        | Nonanal                              | ---         | ---         | tr          | ---        | tr          | tr          | tr          | 0.1         | tr          |
| 1107        | 1107        | 1-Octen-3-yl acetate                 | tr          | tr          | tr          | tr         | tr          | tr          | 0.1         | 0.1         | 0.1         |
| 1112        | 1112        | 2,4-Dimethylhepta-2,4-dienal         | ---         | ---         | ---         | ---        | ---         | ---         | tr          | ---         | ---         |
| 1117        | 1112        | 2,4-Dimethylhepta-2,4-dienal         | ---         | ---         | ---         | ---        | ---         | ---         | tr          | ---         | ---         |
| 1122        | 1120        | <i>trans-p</i> -Mentha-2,8-dien-1-ol | 0.2         | 0.2         | 0.2         | 0.3        | 0.3         | 0.3         | 0.3         | 0.2         | 0.2         |
| 1124        | 1124        | <i>cis-p</i> -Menth-2-en-1-ol        | tr          | tr          | tr          | tr         | tr          | tr          | tr          | tr          | tr          |
| 1132        | 1132        | <i>cis</i> -Limonene oxide           | ---         | ---         | ---         | ---        | ---         | ---         | tr          | tr          | ---         |
| 1137        | 1137        | <i>cis-p</i> -Mentha-2,8-dien-1-ol   | 0.2         | 0.2         | 0.2         | 0.3        | 0.3         | 0.3         | 0.3         | 0.2         | 0.2         |
| 1140        | 1140        | <i>trans</i> -Sabinol                | ---         | ---         | ---         | tr         | tr          | tr          | tr          | tr          | tr          |
| 1142        | 1142        | <i>trans-p</i> -Menth-2-en-1-ol      | ---         | ---         | ---         | ---        | tr          | ---         | tr          | ---         | ---         |
| 1146        | 1145        | <i>trans</i> -Verbenol               | tr          | tr          | tr          | tr         | 0.1         | tr          | 0.1         | tr          | tr          |
| 1151        | 1150        | <i>p</i> -Menth-3-en-8-ol            | 0.1         | tr          | tr          | tr         | tr          | tr          | tr          | tr          | tr          |
| <b>1157</b> | <b>1156</b> | <b>Menthone</b>                      | <b>4.7</b>  | <b>4.9</b>  | <b>6.5</b>  | <b>9.9</b> | <b>10.0</b> | <b>9.8</b>  | <b>11.7</b> | <b>12.8</b> | <b>14.2</b> |
| 1160        | 1160        | <i>iso</i> -Isopulegol               | ---         | ---         | ---         | tr         | tr          | tr          | tr          | tr          | tr          |
| 1163        | 1164        | Menthofuran                          | ---         | ---         | ---         | ---        | tr          | tr          | tr          | tr          | tr          |
| 1166        | 1166        | Isomenthone                          | 0.2         | 0.1         | 0.1         | 0.1        | 0.8         | 0.2         | 1.3         | 0.8         | 3.2         |
| 1170        | 1170        | Umbellulone                          | ---         | ---         | ---         | ---        | 0.1         | tr          | tr          | ---         | ---         |
| 1173        | 1173        | Borneol                              | tr          | tr          | tr          | tr         | 0.1         | 0.1         | 0.1         | tr          | tr          |
| <b>1177</b> | <b>1176</b> | <b><i>trans</i>-Isopulegone</b>      | <b>3.7</b>  | <b>3.7</b>  | <b>3.4</b>  | <b>4.5</b> | <b>4.2</b>  | <b>3.7</b>  | <b>5.0</b>  | <b>3.8</b>  | <b>3.6</b>  |
| 1181        | 1180        | Terpinen-4-ol                        | 0.5         | 0.5         | 0.5         | 0.5        | 0.6         | 0.6         | 0.5         | 0.4         | 0.5         |
| 1188        | 1188        | <i>p</i> -Cymen-8-ol                 | ---         | ---         | ---         | 0.1        | 0.1         | 0.1         | 0.1         | 0.1         | tr          |
| 1195        | 1195        | $\alpha$ -Terpineol                  | 0.4         | 0.4         | 0.4         | 0.3        | 0.4         | 0.4         | 0.3         | 0.4         | 0.4         |
| 1201        | 1201        | <i>cis</i> -Piperitenol              | 2.7         | 2.8         | 2.4         | 2.3        | 2.7         | 2.1         | 2.7         | 2.1         | 2.0         |
| 1206        | 1206        | Decanal                              | ---         | ---         | ---         | tr         | ---         | ---         | tr          | ---         | ---         |
| 1208        | 1208        | Verbenone                            | tr          | 0.1         | 0.1         | 0.1        | 0.1         | tr          | 0.1         | tr          | tr          |
| 1225        | 1224        | Thymol methyl ether                  | 0.3         | 0.4         | 0.3         | 0.5        | 0.6         | 0.5         | 0.6         | 1.1         | 0.9         |
| <b>1241</b> | <b>1241</b> | <b>Pulegone</b>                      | <b>16.6</b> | <b>16.0</b> | <b>13.3</b> | <b>9.7</b> | <b>12.5</b> | <b>10.3</b> | <b>11.9</b> | <b>9.0</b>  | <b>9.3</b>  |
| 1264        | 1267        | Piperitone                           | ---         | ---         | ---         | ---        | ---         | ---         | 0.2         | 0.1         | 0.1         |

[illegible]

|      |      |                                              |     |     |     |     |     |     |     |     |     |
|------|------|----------------------------------------------|-----|-----|-----|-----|-----|-----|-----|-----|-----|
| 1480 | 1480 | Germacrene D                                 | 1.9 | 1.8 | 1.8 | 1.2 | 1.7 | 1.5 | 1.3 | 1.5 | 1.4 |
| 1483 | 1483 | <i>trans</i> - $\beta$ -Bergamotene          | 0.1 | 0.1 | 0.1 | 0.1 | 0.1 | 0.1 | 0.1 | 0.1 | 0.1 |
| 1486 | 1488 | $\delta$ -Selinene                           | --- | --- | --- | --- | --- | --- | tr  | --- | --- |
| 1487 | 1487 | $\beta$ -Selinene                            | tr  |
| 1490 | 1491 | Viridiflorene                                | tr  |
| 1490 | 1490 | $\gamma$ -Amorphene                          | tr  |
| 1494 | 1497 | Bicyclogermacrene                            | 0.3 | 0.3 | 0.3 | 0.2 | 0.3 | 0.3 | 0.2 | 0.2 | 0.2 |
| 1497 | 1497 | $\alpha$ -Muurolene                          | tr  |
| 1503 | 1504 | ( <i>E,E</i> )- $\alpha$ -Farnesene          | 0.4 | 0.3 | 0.4 | 0.3 | 0.3 | 0.4 | 0.2 | 0.2 | 0.3 |
| 1507 | 1508 | $\beta$ -Bisabolene                          | tr  |
| 1512 | 1512 | $\gamma$ -Cadinene                           | 0.1 | tr  |
| 1517 | 1518 | $\delta$ -Cadinene                           | 0.1 | 0.1 | 0.1 | 0.1 | 0.1 | 0.1 | 0.1 | 0.1 | 0.1 |
| 1523 | 1523 | $\beta$ -Sesquiphellandrene                  | 0.3 | 0.2 | 0.2 | 0.2 | 0.3 | 0.2 | 0.2 | 0.3 | 0.2 |
| 1547 | 1546 | $\alpha$ -Elemol                             | tr  |
| 1557 | 1557 | Germacrene B                                 | tr  |
| 1560 | 1560 | ( <i>E</i> )-Nerolidol                       | tr  |
| 1575 | 1576 | Spathulenol                                  | 0.1 | 0.2 | 0.1 | 0.2 | 0.3 | 0.2 | 0.3 | 0.3 | 0.3 |
| 1580 | 1577 | Caryophyllene oxide                          | 0.1 | 0.1 | 0.1 | 0.3 | 0.3 | 0.2 | 0.5 | 0.2 | 0.2 |
| 1608 | 1607 | Humulene epoxide I                           | --- | --- | --- | tr  | --- | --- | 0.1 | --- | tr  |
| 1627 | 1629 | <i>iso</i> -Spathulenol                      | 0.1 | 0.1 | 0.1 | 0.1 | 0.1 | 0.1 | 0.1 | 0.1 | 0.1 |
| 1635 | 1635 | Caryophylla-4(12),8(13)-dien-5 $\beta$ -ol   | --- | --- | --- | --- | tr  | --- | --- | --- | --- |
| 1638 | 1639 | <i>cis</i> -Guaia-3,9-dien-11-ol             | tr  | tr  | tr  | --- | tr  | tr  | --- | tr  | tr  |
| 1640 | 1638 | $\tau$ -Cadinol                              | tr  | tr  | tr  | --- | tr  | tr  | --- | tr  | tr  |
| 1642 | 1640 | $\tau$ -Muurolol                             | tr  | tr  | tr  | --- | tr  | tr  | --- | tr  | tr  |
| 1654 | 1652 | $\alpha$ -Cadinol                            | 0.1 | 0.1 | 0.1 | 0.1 | 0.1 | 0.1 | 0.1 | 0.1 | 0.1 |
| 1682 | 1683 | Germacra-4(15),5,10(14)-trien-1 $\alpha$ -ol | --- | --- | --- | --- | 0.1 | --- | --- | --- | --- |
| 1688 | 1685 | Eudesma-4(15),7-dien-1 $\beta$ -ol           | --- | --- | --- | --- | 0.1 | --- | --- | --- | --- |
| 1691 | 1688 | Shyobunol                                    | --- | --- | --- | --- | tr  | --- | --- | --- | --- |
| 1714 | 1715 | Pentadecanal                                 | --- | --- | --- | --- | --- | --- | --- | tr  | --- |
| 1765 | 1769 | Benzyl benzoate                              | 0.3 | 0.2 | 0.2 | 0.6 | 0.3 | 0.3 | 0.6 | 0.3 | 0.2 |
| 1840 | 1841 | Phytone                                      | --- | --- | --- | --- | tr  | tr  | --- | tr  | tr  |



|      |      |               |     |     |     |     |     |     |     |     |     |
|------|------|---------------|-----|-----|-----|-----|-----|-----|-----|-----|-----|
| 2083 | 2081 | 1-Octadecanol | --- | --- | --- | --- | 0.1 | --- | --- | --- | --- |
|------|------|---------------|-----|-----|-----|-----|-----|-----|-----|-----|-----|

**Supplementary Table S3.** Essential oil composition of *Pycnanthemum virginianum* variety M3.

| RI(calc)   | RI(db)     | Compound                          | M3-R1-H1   | M3-R3-H1   | M3-R1-H2   | M3-R3-H3   |
|------------|------------|-----------------------------------|------------|------------|------------|------------|
| 844        | 841        | 3-Methylcyclopentanone            | 0.2        | tr         | ---        | ---        |
| 925        | 925        | $\alpha$ -Thujene                 | ---        | ---        | tr         | tr         |
| 932        | 932        | $\alpha$ -Pinene                  | ---        | tr         | 0.2        | 0.1        |
| 949        | 950        | Camphene                          | ---        | tr         | tr         | tr         |
| 951        | 951        | 3-Methylcyclohexanone             | tr         | tr         | tr         | tr         |
| 952        | 953        | Thuja-2,4(10)-diene               | ---        | ---        | tr         | tr         |
| 969        | 974        | Hexanoic acid                     | 0.1        | ---        | ---        | ---        |
| 972        | 972        | Sabinene                          | ---        | tr         | 0.1        | 0.1        |
| 973        | 973        | 1-Octen-3-one                     | 0.1        | tr         | ---        | ---        |
| 977        | 978        | $\beta$ -Pinene                   | ---        | 0.1        | 0.3        | 0.2        |
| <b>979</b> | <b>978</b> | <b>1-Octen-3-ol</b>               | <b>3.2</b> | <b>3.8</b> | <b>1.8</b> | <b>1.9</b> |
| 984        | 983        | 3-Octanone                        | 0.2        | 1.0        | 0.5        | 0.5        |
| 989        | 989        | Myrcene                           | tr         | 0.2        | 0.4        | 0.4        |
| 997        | 996        | 3-Octanol                         | 0.2        | 0.3        | 0.1        | 0.1        |
| 1004       | 1004       | <i>p</i> -Mentha-1(7),8-diene     | ---        | tr         | tr         | tr         |
| 1016       | 1017       | $\alpha$ -Terpinene               | ---        | ---        | ---        | tr         |
| 1024       | 1024       | <i>p</i> -Cymene                  | 0.3        | 0.1        | tr         | 0.3        |
| 1029       | 1029       | $\beta$ -Phellandrene             | tr         | tr         | ---        | ---        |
| 1029       | 1030       | Limonene                          | 0.5        | 1.5        | 1.5        | 1.2        |
| 1031       | 1032       | 1,8-Cineole                       | 0.1        | 0.1        | 0.3        | 0.3        |
| 1035       | 1034       | ( <i>Z</i> )- $\beta$ -Ocimene    | ---        | tr         | tr         | tr         |
| 1046       | 1050       | 3,4-Dimethylcyclopentan-1,2-dione | 0.1        | tr         | ---        | ---        |
| 1045       | 1045       | ( <i>E</i> )- $\beta$ -Ocimene    | ---        | 0.1        | 0.1        | 0.2        |
| 1048       | 1058       | 3-Methylcyclohexane-1,2-dione     | 0.2        | tr         | ---        | ---        |
| 1057       | 1057       | $\gamma$ -Terpinene               | ---        | ---        | ---        | tr         |
| 1070       | 1069       | <i>cis</i> -Sabinene hydrate      | ---        | tr         | tr         | tr         |
| 1083       | 1088       | 3-Nonanone                        | ---        | tr         | ---        | ---        |
| 1082       | 1079       | Non-1-en-3-ol                     | ---        | tr         | ---        | tr         |
| 1085       | 1086       | Terpinolene                       | ---        | ---        | tr         | tr         |

|             |             |                                      |             |             |             |             |
|-------------|-------------|--------------------------------------|-------------|-------------|-------------|-------------|
| 1089        | 1093        | <i>p</i> -Cymenene                   | ---         | ---         | ---         | tr          |
| 1101        | 1101        | Linalool                             | ---         | ---         | tr          | 0.1         |
| 1105        | 1107        | Nonanal                              | ---         | ---         | tr          | tr          |
| 1107        | 1107        | 1-Octen-3-yl acetate                 | ---         | 0.2         | tr          | tr          |
| 1124        | 1120        | <i>trans-p</i> -Mentha-2,8-dien-1-ol | ---         | ---         | ---         | tr          |
| 1144        | 1140        | <i>trans</i> -Sabinol                | ---         | ---         | tr          | 0.1         |
| 1146        | 1144        | <i>trans</i> -Tagetone               | ---         | ---         | tr          | ---         |
| 1150        | 1149        | <i>p</i> -Menth-3-en-8-ol            | 0.2         | ---         | ---         | ---         |
| 1150        | 1145        | <i>trans</i> -Verbenol               | 0.1         | 0.1         | 0.1         | 0.1         |
| <b>1156</b> | <b>1156</b> | <b>Menthone</b>                      | <b>4.6</b>  | <b>26.0</b> | <b>3.8</b>  | <b>5.6</b>  |
| <b>1168</b> | <b>1166</b> | <b>Isomenthone</b>                   | <b>1.7</b>  | <b>1.9</b>  | <b>48.0</b> | <b>65.8</b> |
| 1166        | 1164        | Menthofuran                          | tr          | tr          | ---         | ---         |
| 1173        | 1170        | $\delta$ -Terpineol                  | ---         | ---         | tr          | ---         |
| 1175        | 1173        | Borneol                              | ---         | ---         | tr          | tr          |
| 1177        | 1176        | <i>trans</i> -Isopulegone            | 1.7         | 1.4         | 1.2         | 1.1         |
| 1182        | 1183        | Terpinen-4-ol                        | ---         | tr          | tr          | 0.1         |
| 1184        | 1184        | 1-Decen-3-ol                         | ---         | tr          | ---         | ---         |
| 1186        | 1184        | 6-Methyl-2-vinyl-5-hepten-1-ol       | ---         | ---         | tr          | tr          |
| 1198        | 1195        | $\alpha$ -Terpineol                  | 0.2         | 0.2         | 0.3         | 0.3         |
| 1200        | 1201        | <i>cis</i> -Piperitenol              | ---         | ---         | ---         | 0.1         |
| 1207        | 1208        | Decanal                              | ---         | tr          | tr          | tr          |
| 1209        | 1208        | Verbenone                            | 0.3         | 0.1         | 0.1         | 0.1         |
| 1219        | 1221        | 3-Isopropylbenzaldehyde              | ---         | ---         | 0.2         | 0.2         |
| 1226        | 1230        | Cuminaldehyde                        | ---         | 0.1         | ---         | ---         |
| <b>1242</b> | <b>1240</b> | <b>Pulegone</b>                      | <b>71.7</b> | <b>55.9</b> | <b>37.3</b> | <b>16.1</b> |
| 1254        | 1254        | Piperitone                           | ---         | tr          | 0.3         | 0.5         |
| 1258        | 1261        | Pulegone oxide A                     | 0.4         | 0.1         | ---         | ---         |
| 1268        | 1270        | <i>iso</i> -Piperitenone             | 0.3         | 0.2         | 0.1         | tr          |
| 1286        | 1287        | Pulegone oxide B                     | 5.0         | 0.5         | 0.2         | 0.1         |
| 1289        | 1289        | Thymol                               | ---         | 0.6         | tr          | 0.6         |
| 1297        | 1300        | Pulegone oxide C                     | 0.2         | tr          | ---         | ---         |

|      |      |                                      |     |     |     |     |
|------|------|--------------------------------------|-----|-----|-----|-----|
| 1297 | 1300 | Carvacrol                            | --- | tr  | --- | tr  |
| 1308 | 1309 | 4-Vinylguaiaicol                     | --- | --- | --- | tr  |
| 1331 | 1332 | Bicycloelemene                       | --- | --- | --- | tr  |
| 1335 | 1335 | $\delta$ -Elemene                    | --- | 0.1 | tr  | 0.2 |
| 1337 | 1339 | Piperitenone                         | 0.2 | 0.2 | 0.2 | 0.1 |
| 1338 | ---  | Unidentified                         | 0.2 | --- | --- | 0.3 |
| 1342 | 1348 | Mint furanone isomer A               | 0.1 | 0.1 | --- | --- |
| 1344 | 1349 | Mint furanone isomer B               | 0.1 | tr  | --- | --- |
| 1375 | 1375 | $\alpha$ -Copaene                    | --- | tr  | tr  | tr  |
| 1381 | 1383 | <i>cis</i> - $\beta$ -Elemene        | --- | tr  | tr  | tr  |
| 1383 | 1382 | $\beta$ -Bourbonene                  | 0.2 | 0.2 | 0.1 | 0.2 |
| 1385 | 1385 | $\alpha$ -Bourbonene                 | --- | --- | --- | tr  |
| 1389 | 1390 | <i>trans</i> - $\beta$ -Elemene      | --- | 0.3 | 0.2 | 0.2 |
| 1391 | 1392 | ( <i>Z</i> )-Jasmone                 | 0.2 | 0.1 | 0.1 | 0.1 |
| 1418 | 1417 | ( <i>E</i> )- $\beta$ -Caryophyllene | --- | 1.5 | 1.0 | 1.1 |
| 1429 | 1430 | $\beta$ -Copaene                     | --- | tr  | tr  | tr  |
| 1432 | 1432 | <i>trans</i> - $\alpha$ -Bergamotene | 0.1 | 0.2 | 0.2 | 0.1 |
| 1434 | ---  | Unidentified                         | 1.2 | 0.3 | --- | tr  |
| 1439 | 1440 | ( <i>Z</i> )- $\beta$ -Farnesene     | --- | --- | --- | tr  |
| 1442 | 1447 | <i>iso</i> -Germacrene D             | --- | --- | --- | tr  |
| 1452 | 1451 | ( <i>E</i> )- $\beta$ -Farnesene     | --- | --- | --- | tr  |
| 1454 | 1454 | $\alpha$ -Humulene                   | --- | 0.2 | 0.1 | 0.2 |
| 1466 | 1465 | <i>cis</i> -Muurolo-4(14),5-diene    | --- | --- | --- | tr  |
| 1473 | 1478 | $\gamma$ -Muurolene                  | --- | tr  | --- | tr  |
| 1480 | 1480 | Germacrene D                         | --- | 0.5 | 0.7 | 1.0 |
| 1483 | 1483 | <i>trans</i> - $\beta$ -Bergamotene  | --- | 0.1 | tr  | tr  |
| 1484 | 1485 | $\gamma$ -Thujaplicin                | 0.2 | 0.1 | --- | --- |
| 1489 | 1489 | ( <i>Z,E</i> )- $\alpha$ -Farnesene  | --- | --- | --- | tr  |
| 1490 | 1493 | Menthallactone                       | 0.1 | tr  | --- | --- |
| 1494 | 1497 | Bicyclogermacrene                    | --- | --- | 0.1 | 0.1 |
| 1497 | 1497 | $\alpha$ -Muurolene                  | --- | tr  | --- | tr  |

|      |      |                                     |     |     |     |     |
|------|------|-------------------------------------|-----|-----|-----|-----|
| 1503 | 1504 | ( <i>E,E</i> )- $\alpha$ -Farnesene | --- | 0.2 | 0.2 | 0.2 |
| 1506 | 1508 | Germacrene A                        | --- | --- | tr  | tr  |
| 1507 | 1508 | $\beta$ -Bisabolene                 | --- | tr  | tr  | tr  |
| 1511 | 1512 | $\gamma$ -Cadinene                  | --- | tr  | --- | tr  |
| 1517 | 1518 | $\delta$ -Cadinene                  | --- | tr  | tr  | tr  |
| 1523 | 1523 | $\beta$ -Sesquiphellandrene         | --- | 0.1 | 0.1 | 0.1 |
| 1543 | 1546 | $\alpha$ -Elemol                    | --- | tr  | --- | --- |
| 1546 | 1546 | $\alpha$ -Elemol                    | --- | --- | --- | tr  |
| 1556 | 1557 | Germacrene B                        | --- | tr  | --- | tr  |
| 1559 | 1560 | ( <i>E</i> )-Nerolidol              | --- | tr  | --- | tr  |
| 1575 | 1576 | Spathulenol                         | --- | tr  | tr  | tr  |
| 1580 | 1577 | Caryophyllene oxide                 | 1.8 | 0.6 | 0.1 | 0.1 |
| 1607 | 1607 | Humulene epoxide I                  | 0.2 | 0.1 | --- | tr  |
| 1627 | 1629 | <i>iso</i> -Spathulenol             | 0.1 | 0.2 | 0.1 | tr  |
| 1637 | 1639 | <i>cis</i> -Guaia-3,9-dien-11-ol    | --- | --- | --- | tr  |
| 1640 | 1638 | $\tau$ -Cadinol                     | --- | --- | --- | tr  |
| 1642 | 1640 | $\tau$ -Muurolol                    | --- | --- | --- | tr  |
| 1654 | 1655 | $\alpha$ -Cadinol                   | --- | 0.1 | tr  | tr  |
| 1763 | 1769 | Benzyl benzoate                     | --- | --- | --- | tr  |

---

**Supplementary Table S4.** Essential oil composition of *Pycnanthemum virginianum* variety M4.

| RI(calc)    | RI(db)      | Compound                       | M4-R1-H1   | M4-R2-H1   | M4-R3-H1   | M4-R1-H2    | M4-R2-H2    | M4-R3-H2    | M4-R1-H3    | M4-R2-H3    | M4-R3-H3    |
|-------------|-------------|--------------------------------|------------|------------|------------|-------------|-------------|-------------|-------------|-------------|-------------|
| 925         | 925         | $\alpha$ -Thujene              | tr         | 0.2        | 1.8        | 0.1         | 0.5         | 1.0         | 0.1         | 0.1         | 0.2         |
| 932         | 932         | $\alpha$ -Pinene               | tr         | 0.1        | 0.6        | 0.1         | 0.2         | 0.4         | tr          | 0.1         | 0.1         |
| 949         | 950         | Camphene                       | tr         | tr         | 0.2        | 0.1         | 0.2         | 0.3         | tr          | 0.1         | 0.2         |
| 952         | 951         | 3-Methylcyclohexanone          | ---        | ---        | ---        | ---         | ---         | ---         | tr          | ---         | ---         |
| 952         | 953         | Thuja-2,4(10)-diene            | ---        | ---        | ---        | ---         | tr          | tr          | ---         | tr          | tr          |
| 962         | 960         | Benzaldehyde                   | ---        | ---        | ---        | ---         | tr          | ---         | tr          | tr          | tr          |
| 970         | 971         | Verbenene                      | ---        | ---        | ---        | ---         | tr          | ---         | ---         | ---         | ---         |
| 972         | 971         | Sabinene                       | tr         | 0.1        | 0.2        | tr          | 0.1         | 0.1         | tr          | tr          | tr          |
| 973         | 973         | 1-Octen-3-one                  | ---        | ---        | ---        | ---         | ---         | ---         | ---         | tr          | ---         |
| 977         | 978         | $\beta$ -Pinene                | tr         | 0.1        | 0.4        | 0.1         | 0.3         | 0.3         | 0.1         | 0.1         | 0.2         |
| <b>979</b>  | <b>978</b>  | <b>1-Octen-3-ol</b>            | <b>3.7</b> | <b>2.7</b> | <b>3.1</b> | <b>5.5</b>  | <b>6.1</b>  | <b>4.8</b>  | <b>4.0</b>  | <b>6.3</b>  | <b>7.0</b>  |
| 984         | 983         | 3-Octanone                     | 0.4        | 0.3        | 0.4        | 0.8         | 0.9         | 0.7         | 0.6         | 0.7         | 0.8         |
| 989         | 989         | Myrcene                        | 0.7        | 0.9        | 2.4        | 0.3         | 0.9         | 1.2         | 0.6         | 0.4         | 0.5         |
| 997         | 996         | 3-Octanol                      | 0.1        | 0.1        | 0.1        | 0.2         | 0.2         | 0.1         | 0.1         | 0.2         | 0.2         |
| 1004        | 1004        | <i>p</i> -Mentha-1(7),8-diene  | ---        | tr         | ---        | ---         | tr          | tr          | ---         | tr          | ---         |
| 1007        | 1007        | $\alpha$ -Phellandrene         | 0.1        | 0.1        | 0.3        | tr          | 0.1         | 0.1         | 0.1         | tr          | tr          |
| 1009        | 1008        | $\delta$ -3-Carene             | tr         | tr         | 0.1        | tr          | 0.1         | 0.1         | tr          | tr          | tr          |
| 1017        | 1017        | $\alpha$ -Terpinene            | 0.7        | 0.9        | 2.8        | 0.2         | 0.9         | 1.2         | 0.6         | 0.3         | 0.3         |
| 1020        | 1022        | <i>m</i> -Cymene               | tr         | tr         | ---        | 0.1         | 0.1         | tr          | tr          | tr          | 0.1         |
| <b>1025</b> | <b>1024</b> | <b><i>p</i>-Cymene</b>         | <b>3.5</b> | <b>3.3</b> | <b>8.1</b> | <b>19.7</b> | <b>24.1</b> | <b>23.7</b> | <b>10.5</b> | <b>18.2</b> | <b>28.1</b> |
| 1027        | 1026        | 2-Acetyl-3-methylfuran         | ---        | tr         | ---        | 0.8         | 0.6         | 0.5         | 0.3         | 1.0         | 1.1         |
| 1029        | 1030        | Limonene                       | 0.3        | 0.9        | 0.8        | 0.5         | 0.7         | 0.8         | 0.5         | 0.6         | 0.4         |
| 1030        | 1029        | $\beta$ -Phellandrene          | 0.1        | 0.1        | 0.2        | 0.1         | 0.2         | 0.2         | 0.1         | 0.1         | 0.1         |
| 1031        | 1030        | 1,8-Cineole                    | 0.1        | 0.1        | tr         | 0.1         | 0.1         | 0.1         | 0.1         | 0.2         | 0.2         |
| 1035        | 1034        | ( <i>Z</i> )- $\beta$ -Ocimene | 0.2        | 0.2        | 0.4        | tr          | 0.2         | 0.2         | 0.2         | 0.1         | 0.2         |
| 1045        | 1045        | ( <i>E</i> )- $\beta$ -Ocimene | 1.5        | 1.0        | 2.3        | ---         | 0.1         | 0.2         | 0.2         | 0.2         | 0.2         |
| 1057        | 1057        | $\gamma$ -Terpinene            | 2.4        | 2.6        | 6.7        | tr          | 1.4         | 2.1         | 1.5         | 1.0         | 1.0         |
| 1069        | 1069        | <i>cis</i> -Sabinene hydrate   | 1.2        | 0.7        | 1.0        | 3.4         | 2.3         | 1.9         | 1.5         | 3.1         | 3.4         |
| 1080        | 1079        | 1-Nonen-3-ol                   | 0.1        | tr         | tr         | 0.1         | 0.1         | 0.1         | 0.1         | 0.1         | 0.1         |

|      |      |                                      |            |            |            |           |            |           |             |            |            |
|------|------|--------------------------------------|------------|------------|------------|-----------|------------|-----------|-------------|------------|------------|
| 1085 | 1086 | Terpinolene                          | 0.1        | 0.1        | 0.1        | 0.1       | 0.2        | 0.1       | 0.1         | 0.1        | 0.1        |
| 1090 | 1091 | <i>p</i> -Cymenene                   | ---        | ---        | tr         | 0.2       | 0.2        | 0.1       | 0.1         | 0.3        | 0.4        |
| 1100 | 1099 | Linalool                             | 0.3        | 0.2        | 0.2        | 0.3       | 0.4        | 0.3       | 0.3         | 0.3        | 0.2        |
| 1101 | 1099 | <i>trans</i> -Sabinene hydrate       | 0.1        | 0.1        | 0.1        | 0.7       | 0.5        | 0.4       | 0.3         | 0.8        | 0.8        |
| 1107 | 1107 | 1-Octen-3-yl acetate                 | 0.1        | 0.1        | 0.2        | 0.6       | 0.6        | 0.5       | 0.5         | 0.6        | 0.8        |
| 1113 | ---  | 2,4-Dimethylhepta-2,4-dienal         | ---        | ---        | ---        | 0.1       | 0.2        | 0.1       | 0.1         | 0.2        | 0.2        |
| 1117 | ---  | 2,4-Dimethylhepta-2,4-dienal         | ---        | ---        | ---        | 0.2       | 0.2        | 0.1       | 0.1         | 0.2        | 0.3        |
| 1121 | 1121 | <i>trans-p</i> -Mentha-2,8-dien-1-ol | ---        | ---        | ---        | 0.1       | 0.1        | tr        | tr          | 0.1        | 0.1        |
| 1124 | 1124 | <i>cis-p</i> -Menth-2-en-1-ol        | ---        | ---        | ---        | 0.1       | 0.1        | 0.1       | tr          | 0.1        | 0.1        |
| 1132 | 1132 | <i>cis</i> -Limonene oxide           | ---        | ---        | ---        | 0.1       | 0.1        | tr        | tr          | 0.1        | tr         |
| 1137 | 1138 | <i>trans</i> -Limonene oxide         | ---        | ---        | ---        | 0.1       | 0.2        | 0.1       | 0.1         | 0.2        | 0.1        |
| 1139 | 1140 | <i>trans</i> -Sabinol                | ---        | ---        | ---        | ---       | 0.1        | tr        | ---         | 0.1        | tr         |
| 1140 | 1140 | <i>trans</i> -Pinocarveol            | ---        | ---        | ---        | 0.1       | 0.2        | 0.1       | 0.1         | 0.2        | 0.2        |
| 1142 | 1142 | <i>trans-p</i> -Menth-2-en-1-ol      | ---        | ---        | ---        | ---       | 0.1        | 0.1       | 0.1         | 0.1        | ---        |
| 1145 | 1145 | <i>trans</i> -Verbenol               | ---        | ---        | ---        | 0.3       | 0.5        | 0.2       | 0.2         | 0.6        | 0.7        |
| 1147 | 1145 | Camphor                              | ---        | ---        | ---        | ---       | ---        | ---       | ---         | 0.1        | ---        |
| 1150 | 1150 | $\alpha$ -Phellandren-8-ol           | ---        | ---        | ---        | ---       | tr         | ---       | ---         | ---        | ---        |
| 1150 | 1150 | <i>p</i> -Menth-3-en-8-ol            | ---        | ---        | ---        | ---       | ---        | ---       | 0.1         | tr         | ---        |
| 1156 | 1156 | Menthone                             | 0.1        | 0.6        | tr         | tr        | 0.1        | tr        | 1.1         | 1.4        | 0.1        |
| 1165 | 1166 | <b>Isomenthone</b>                   | <b>1.5</b> | <b>6.3</b> | <b>0.4</b> | <b>tr</b> | <b>1.0</b> | <b>tr</b> | <b>12.4</b> | <b>5.9</b> | <b>0.7</b> |
| 1169 | 1168 | <i>trans</i> -Phellandrene epoxide   | ---        | ---        | ---        | ---       | 0.1        | ---       | ---         | 0.1        | 0.1        |
| 1171 | 1170 | Borneol                              | 0.4        | 0.2        | 0.3        | 0.9       | 1.6        | 0.7       | 0.5         | 1.4        | 1.3        |
| 1176 | 1176 | <i>trans</i> -Isopulegone            | ---        | 0.7        | ---        | ---       | ---        | ---       | 0.2         | 0.5        | ---        |
| 1180 | 1180 | Terpinen-4-ol                        | 0.6        | 0.4        | 0.7        | 1.1       | 2.0        | 1.1       | 1.0         | 1.7        | 1.6        |
| 1188 | 1188 | <i>p</i> -Cymen-8-ol                 | ---        | ---        | 0.1        | 1.7       | 1.6        | 0.9       | 0.7         | 2.6        | 3.2        |
| 1195 | 1195 | $\alpha$ -Terpineol                  | 0.1        | 0.2        | 0.1        | 0.2       | 0.3        | ---       | 0.2         | 0.3        | 0.2        |
| 1200 | 1201 | <i>cis</i> -Piperitenol              | ---        | 0.1        | ---        | ---       | ---        | ---       | ---         | 0.3        | ---        |
| 1209 | 1208 | Verbenone                            | ---        | ---        | ---        | ---       | ---        | 0.2       | ---         | 0.1        | ---        |
| 1215 | 1216 | 3-Isopropylbenzaldehyde              | 0.1        | tr         | tr         | 0.2       | 0.1        | ---       | 0.3         | 0.1        | 0.1        |
| 1215 | 1217 | Coumaran                             | ---        | ---        | ---        | ---       | ---        | 0.1       | ---         | ---        | 0.1        |
| 1221 | 1223 | <i>trans</i> -Carveol                | ---        | ---        | ---        | ---       | 0.1        | 1.6       | ---         | 0.2        | 0.1        |

|      |      |                                      |      |      |      |      |      |      |      |      |      |
|------|------|--------------------------------------|------|------|------|------|------|------|------|------|------|
| 1229 | 1229 | Thymol methyl ether                  | 0.4  | 0.3  | 0.2  | 1.6  | 2.4  | ---  | 5.4  | 3.9  | 4.5  |
| 1232 | 1232 | <i>cis</i> -Carveol                  | ---  | ---  | ---  | ---  | ---  | tr   | ---  | 0.1  | ---  |
| 1241 | 1241 | Pulegone                             | 4.2  | 29.5 | 1.6  | 0.1  | 1.7  | tr   | 4.0  | 2.5  | 0.3  |
| 1242 | 1242 | Cuminal                              | ---  | ---  | ---  | 0.2  | ---  | ---  | ---  | 0.5  | 0.5  |
| 1243 | 1242 | Carvone                              | ---  | ---  | ---  | ---  | ---  | ---  | ---  | 0.1  | ---  |
| 1250 | 1252 | Thymoquinone                         | ---  | ---  | ---  | 11.0 | 1.7  | 0.8  | 0.9  | 1.0  | 1.0  |
| 1255 | 1254 | Piperitone                           | ---  | ---  | ---  | ---  | ---  | ---  | 0.9  | 0.1  | ---  |
| 1290 | 1289 | Thymol                               | 68.6 | 38.3 | 54.6 | 34.0 | 32.7 | 42.6 | 37.1 | 28.1 | 27.6 |
| 1293 | 1287 | Pulegone oxide B                     | ---  | ---  | ---  | ---  | ---  | ---  | ---  | 0.1  | ---  |
| 1294 | 1291 | <i>p</i> -Cymen-7-ol                 | ---  | ---  | ---  | 0.8  | 0.8  | 0.5  | 0.2  | 1.2  | 1.2  |
| 1299 | 1296 | Carvacrol                            | 1.7  | 0.9  | 1.2  | 1.4  | 0.8  | 1.1  | 0.7  | 0.8  | 0.6  |
| 1300 | 1299 | Perilla alcohol                      | ---  | ---  | ---  | ---  | tr   | ---  | ---  | 0.1  | ---  |
| 1305 | 1306 | <i>iso</i> -Ascaridol                | ---  | ---  | ---  | 0.1  | tr   | tr   | ---  | 0.1  | 0.1  |
| 1309 | 1309 | 4-Vinylguaiaicol                     | ---  | ---  | ---  | 0.1  | 0.1  | 0.1  | 0.1  | 0.1  | 0.1  |
| 1331 | 1326 | Bicycloelemene                       | ---  | 0.1  | 0.1  | ---  | tr   | tr   | 0.1  | ---  | ---  |
| 1335 | 1335 | $\delta$ -Elemene                    | 0.1  | 0.5  | 0.5  | 0.2  | 0.2  | 0.2  | 0.4  | 0.2  | 0.1  |
| 1339 | 1339 | Piperitenone                         | tr   | 0.1  | ---  | ---  | ---  | ---  | 0.1  | ---  | ---  |
| 1340 | ---  | Unidentified                         | 0.1  | 0.4  | ---  | ---  | ---  | ---  | 0.2  | 1.2  | 0.2  |
| 1341 | 1345 | Thymyl acetate                       | ---  | ---  | 0.1  | ---  | ---  | ---  | ---  | ---  | ---  |
| 1375 | 1375 | $\alpha$ -Copaene                    | 0.1  | 0.1  | 0.1  | 0.1  | 0.1  | 0.1  | 0.1  | 0.1  | 0.1  |
| 1381 | 1383 | <i>cis</i> - $\beta$ -Elemene        | ---  | tr   | ---  | ---  | ---  | ---  | tr   | ---  | ---  |
| 1382 | 1382 | $\beta$ -Bourbonene                  | 0.1  | 0.1  | 0.1  | 0.3  | 0.2  | 0.2  | 0.4  | 0.2  | 0.3  |
| 1383 | 1385 | ( <i>E</i> )-Jasmone                 | ---  | ---  | ---  | ---  | 0.1  | ---  | ---  | 0.1  | ---  |
| 1389 | 1390 | <i>trans</i> - $\beta$ -Elemene      | 0.2  | 0.3  | 0.3  | 0.3  | 0.3  | 0.2  | 0.4  | 0.3  | 0.2  |
| 1391 | 1392 | ( <i>Z</i> )-Jasmone                 | 0.1  | 0.1  | 0.1  | 0.1  | 0.1  | 0.1  | 0.1  | 0.1  | 0.1  |
| 1403 | 1405 | ( <i>Z</i> )- $\beta$ -Caryophyllene | ---  | ---  | ---  | 0.1  | 0.1  | tr   | tr   | tr   | 0.1  |
| 1417 | 1422 | $\beta$ -Ylangene                    | ---  | ---  | ---  | ---  | ---  | ---  | ---  | ---  | 0.1  |
| 1418 | 1417 | ( <i>E</i> )- $\beta$ -Caryophyllene | 1.7  | 1.6  | 2.0  | 2.1  | 1.7  | 1.4  | 2.3  | 1.4  | 0.9  |
| 1429 | 1430 | $\beta$ -Copaene                     | 0.1  | 0.1  | 0.1  | 0.2  | 0.1  | 0.1  | 0.1  | 0.1  | 0.1  |
| 1432 | 1432 | <i>trans</i> - $\alpha$ -Bergamotene | 0.3  | 0.3  | 0.3  | 0.4  | 0.2  | 0.2  | 0.4  | 0.3  | 0.2  |
| 1454 | 1453 | $\alpha$ -Humulene                   | 0.3  | 0.3  | 0.4  | 0.3  | 0.3  | 0.2  | 0.4  | 0.2  | 0.2  |



|      |      |                                             |     |     |     |     |     |     |     |     |     |
|------|------|---------------------------------------------|-----|-----|-----|-----|-----|-----|-----|-----|-----|
| 1474 | 1478 | $\gamma$ -Muurolene                         | 0.1 | tr  | 0.1 | 0.1 | 0.1 | 0.1 | 0.1 | 0.1 | 0.1 |
| 1476 | 1475 | $\gamma$ -Gurjunene                         | 0.1 | tr  | 0.1 | 0.2 | 0.1 | 0.1 | 0.1 | 0.1 | 0.1 |
| 1480 | 1480 | Germacrene D                                | 0.8 | 1.8 | 1.5 | 0.8 | 0.8 | 0.8 | 1.7 | 0.8 | 0.5 |
| 1483 | 1483 | <i>trans</i> - $\beta$ -Bergamotene         | 0.1 | 0.1 | 0.1 | 0.1 | 0.1 | 0.1 | 0.1 | 0.1 | 0.1 |
| 1485 | 1485 | $\gamma$ -Thujaplicin                       | --- | --- | --- | 1.1 | 0.2 | 0.1 | 0.1 | 0.2 | 0.1 |
| 1487 | 1489 | $\delta$ -Selinene                          | tr  | tr  | tr  | --- | --- | --- | --- | --- | --- |
| 1487 | 1489 | $\beta$ -Selinene                           | 0.1 | tr  | 0.1 | 0.2 | 0.1 | 0.1 | 0.1 | 0.2 | 0.1 |
| 1490 | 1493 | Callicarpenal                               | --- | --- | --- | 0.2 | 0.1 | 0.1 | 0.1 | 0.2 | 0.2 |
| 1491 | 1491 | Viridiflorene                               | tr  | tr  | tr  | --- | --- | --- | --- | --- | --- |
| 1492 | 1490 | $\gamma$ -Amorphene                         | tr  | tr  | tr  | --- | --- | --- | --- | --- | --- |
| 1494 | 1497 | Bicyclogermacrene                           | --- | 0.4 | 0.3 | 0.1 | 0.2 | 0.2 | 0.3 | 0.2 | 0.1 |
| 1494 | 1497 | $\alpha$ -Selinene                          | 0.2 | --- | 0.1 | 0.1 | --- | --- | --- | --- | 0.1 |
| 1497 | 1497 | $\alpha$ -Muurolene                         | tr  | tr  | tr  | 0.1 | tr  | tr  | tr  | tr  | tr  |
| 1503 | 1504 | ( <i>E,E</i> )- $\alpha$ -Farnesene         | 0.5 | 0.4 | 0.4 | --- | --- | tr  | 0.1 | 0.1 | 0.1 |
| 1506 | 1508 | $\beta$ -Bisabolene                         | 0.1 | 0.1 | 0.1 | 0.1 | tr  | tr  | 0.1 | 0.1 | tr  |
| 1512 | 1512 | $\gamma$ -Cadinene                          | 0.1 | tr  | 0.1 | 0.1 | 0.1 | tr  | tr  | 0.1 | 0.1 |
| 1513 | 1515 | Cubebol                                     | --- | --- | --- | --- | tr  | --- | --- | tr  | --- |
| 1517 | 1518 | $\delta$ -Cadinene                          | 0.2 | 0.1 | 0.2 | 0.1 | 0.1 | 0.1 | 0.1 | 0.1 | 0.1 |
| 1523 | 1523 | $\beta$ -Sesquiphellandrene                 | 0.3 | 0.3 | 0.3 | 0.4 | 0.2 | 0.2 | 0.4 | 0.2 | 0.2 |
| 1536 | 1538 | $\alpha$ -Cadinene                          | tr  | --- | --- | --- | --- | --- | --- | --- | --- |
| 1546 | 1546 | $\alpha$ -Elemol                            | tr  | tr  | tr  | --- | tr  | tr  | --- | 0.1 | tr  |
| 1551 | 1549 | Thymohydroquinone                           | --- | 0.1 | 0.2 | 0.6 | 1.0 | 1.4 | 1.0 | 0.1 | 0.1 |
| 1557 | 1557 | Germacrene B                                | tr  | tr  | tr  | --- | --- | tr  | --- | --- | --- |
| 1560 | 1560 | ( <i>E</i> )-Nerolidol                      | tr  | tr  | tr  | --- | --- | tr  | --- | --- | --- |
| 1575 | 1576 | Spathulenol                                 | 0.3 | 0.1 | 0.1 | 0.4 | 0.3 | 0.3 | 0.3 | 0.4 | 0.5 |
| 1580 | 1577 | Caryophyllene oxide                         | 0.3 | 0.1 | 0.1 | 1.0 | 0.9 | 0.6 | 0.6 | 1.2 | 1.6 |
| 1607 | 1607 | Humulene epoxide I                          | tr  | --- | --- | 0.2 | 0.1 | 0.1 | 0.1 | 0.2 | 0.2 |
| 1627 | 1629 | <i>iso</i> -Spathulenol                     | 0.3 | 0.1 | 0.2 | 0.5 | 0.4 | 0.3 | 0.3 | 0.4 | 0.4 |
| 1631 | 1630 | Caryophylla-4(12),8(13)-dien-5 $\alpha$ -ol | --- | --- | --- | --- | 0.1 | --- | --- | 0.1 | --- |
| 1635 | 1635 | Caryophylla-4(12),8(13)-dien-5 $\beta$ -ol  | --- | --- | --- | --- | 0.1 | tr  | --- | 0.1 | 0.1 |
| 1636 | 1638 | $\tau$ -Cadinol                             | tr  | tr  | tr  | --- | --- | --- | --- | --- | --- |

|      |      |                                  |     |     |     |     |     |     |     |     |     |
|------|------|----------------------------------|-----|-----|-----|-----|-----|-----|-----|-----|-----|
| 1638 | 1640 | $\tau$ -Muurolol                 | tr  | tr  | tr  | --- | --- | --- | --- | --- | --- |
| 1639 | 1639 | <i>cis</i> -Guaia-3,9-dien-11-ol | 0.1 | 0.1 | 0.1 | --- | --- | --- | --- | --- | --- |
| 1654 | 1652 | $\alpha$ -Cadinol                | 0.1 | 0.1 | 0.1 | --- | 0.1 | 0.1 | 0.1 | 0.1 | 0.1 |
| 1658 | 1658 | Selin-11-en-4 $\alpha$ -ol       | tr  | tr  | tr  | --- | --- | --- | --- | --- | --- |
| 1764 | 1769 | Benzyl benzoate                  | --- | 0.1 | --- | --- | --- | --- | tr  | --- | --- |
| 1840 | 1841 | Phytone                          | --- | --- | --- | --- | --- | --- | tr  | --- | --- |

---

**Supplementary Table S5.** Enantiomeric distribution of terpenoid constituents of *Pycnanthemum virginianum*, variety M1.

[illegible]

**Supplementary Table S6.** Enantiomeric distribution of terpenoid constituents of *Pycnanthemum virginianum*, variety M2.

[illegible]

**Supplementary Table S7.** Enantiomeric distribution of terpenoid constituents of *Pycnanthemum virginianum*, variety M3.

| Compound                             | ED, (+):(-) |           |           |           |
|--------------------------------------|-------------|-----------|-----------|-----------|
|                                      | M3-R1-H1    | M3-R3-H1  | M3-R1-H2  | M3-R3-H3  |
| $\alpha$ -Pinene                     | ---         | 21.1:78.9 | 24.3:75.7 | 24.8:75.2 |
| Sabinene                             | ---         | ---       | 27.7:72.3 | 28.4:71.6 |
| $\beta$ -Pinene                      | ---         | 46.7:53.3 | 45.9:54.1 | 45.0:55.0 |
| Limonene                             | 7.7:92.3    | 6.2:93.8  | 6.9:93.1  | 6.8:93.2  |
| Menthone                             | 0:100       | 0:100     | 0:100     | 0:100     |
| Isomenthone                          | 100:0       | 100:0     | 100:0     | 100:0     |
| $\alpha$ -Terpineol                  | 10.8:89.2   | 10.7:89.3 | 8.7:91.3  | 8.7:91.3  |
| Pulegone                             | 100:0       | 100:0     | 100:0     | 100:0     |
| Piperitone                           | ---         | 85.9:14.1 | 90.2:9.8  | 92.0:8.0  |
| <i>trans</i> - $\beta$ -Elemene      | ---         | 18.0:82.0 | 15.9:84.1 | 14.3:85.7 |
| ( <i>E</i> )- $\beta$ -Caryophyllene | ---         | 100:0     | 100:0     | 100:0     |
| Germacrene D                         | ---         | 92.5:7.5  | 91.2:8.8  | 90.0:9.1  |
| $\delta$ -Cadinene                   | ---         | 0:100     | 0:100     | 0:100     |

**Supplementary Table S8.** Enantiomeric distribution of terpenoid constituents of *Pycnanthemum virginianum*, variety M4.

[illegible]
