# Supplementary figures and images for: Essential Oils of Four Virginia Mountain Mint (Pycnanthemum virginianum) Varieties Grown in North Alabama
Source: MDPI journal article supplement (doi:10.3390/plants10071397), 2021-07-08

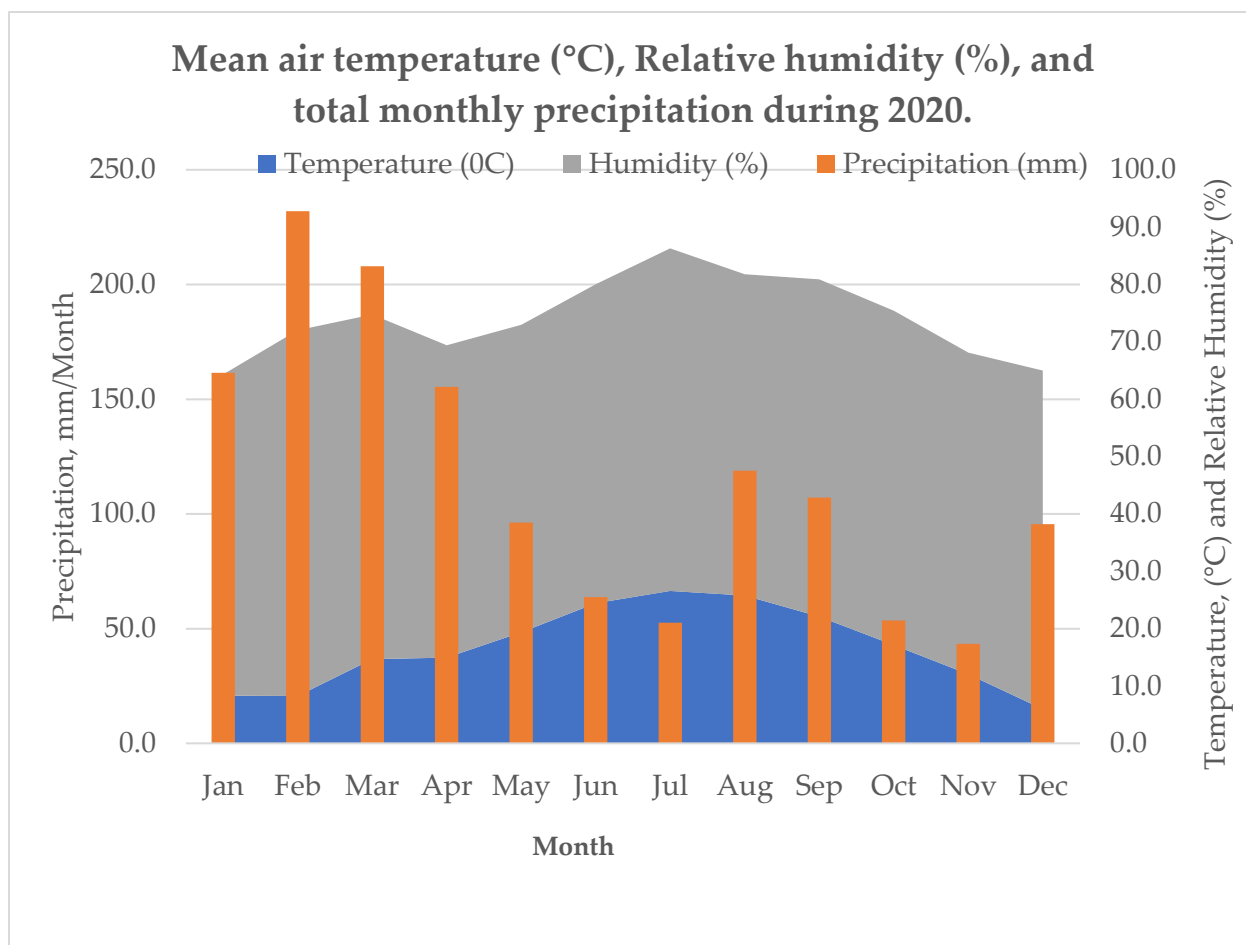

**Figure S1.** Huntsville, Alabama, weather data, 2020.

Supplement: s1 [file s1]
